# Supplementary material for: An Accurate Metagenomics Pipeline to Characterize Self-Collected Vaginal Microbiome Samples
Source: Preprints.org preprint supplement (doi:10.20944/preprints202405.1036.v1), 2024-05-15
Supplement: Supplementary file 3 [file supplementary]

## Sheet: Sup Table 1
ATCC Culture Identification	ATCC Strain	SAGE Database Top Hit	Percent Identity	Relative Abundance	Assigned Reads	Total Sample Reads	Final Identification	Accuracy
Escherichia coli	E coli BAA371	Campylobacter jejuni	0.886	0.704	6780	9625	Negative (below threshold)	False Negative
Enterococcus faecalis	E fcl 33186	Enterococcus faecalis	0.965	0.767	7061	9209	Negative (below threshold)	False Negative
Enterococcus faecium	E fcm BAA- 472	Enterococcus faecium	0.963	0.535	4046	7560	Negative (below threshold)	False Negative
Streptococcus agalactiae	GBS 13813	Streptococcus agalactiae	0.966	0.917	12298	13408	Negative (below threshold)	False Negative
Lactobacillus acidophilus	L aci 4356	Mycolicibacterium hassiacum	0.837	0.17	209	1232	Negative (below threshold)	False Negative
Mycoplasma genitalium	M gent 49897	Mycoplasma genitalium	0.976	0.936	3282	3506	Negative (below threshold)	False Negative
Pseudomonas aeruginosa	P aerug 9721	Pseudomonas aeruginosa	0.974	0.388	3688	9503	Negative (below theshold)	False Negative
Proteus mirabilis	P int 2564	Staphylococcus saprophyticus	0.97	0.768	1267	1649	Negative (below threshold)	False Negative
Staphylococcus aureus	S aur 27661	Staphylococcus aureus	0.964	0.803	7285	9077	Negative (below threshold)	False Negative
Staphylococcus haemolyticus	S haem 29969 1	Staphylococcus haemolyticus	0.956	0.715	10920	15282	Negative (below threshold)	False Negative
Staphylococcus haemolyticus	S haem 29970	Staphylococcus haemolyticus	0.958	0.706	10723	15186	Negative (below threshold)	False Negative
Staphylococcus lugdunensis	S lug 49576	Staphylococcus lugdunensis	0.972	0.957	15606	16315	Negative (below thrreshold)	False Negative
Anaerococcus prevotii	A pre 9321	Anaerococcus tetradius	0.869	0.27	28664	106298	Anaerococcus tetradius	False Positive
Anaerococcus vaginalis	A vaginae 51170 1	Anaerococcus hydrogenalis	0.909	0.687	70427	102586	Anerococcus hydrogenalis	False Positive
Salmonella enterica	S ent 29630	Priestia megaterium	0.892	0.961	32493	33829	Priestia megaterium	False Positive
Streptococcus mitis	S mit 15914	Streptococcus oralis	0.933	0.784	97914	124932	Streptococcus mitis	False Positive
Campylobacter coli	C coli 33559	Campylobacter jejuni	0.866	0.984	148831	151209	Campylobacter jejuni	False Positive
Campylobacter lari	C lari BAA1060D5	Campylobacter jejuni	0	0.83	110293	132843	Campylobacter jejuni	False Positive
Serratia marcescens	S mar 31062	Proteus mirabilis	0.948	0.069	203	2938	Negative (below threshold)	False Negative
Serratia marcescens	S mar 45297	Streptococcus agalactiae	0.97	0.264	303	1146	Negative (below threshold)	False Negative
Serratia marcescens	S mar 21212	Gardnerella vaginalis	0.966	0.086	172	2005	Negative (below threshold)	False Negative
Acinetobacter baylyi	A baylyi 33305 1	Acinetobacter ursingii	0.796	0.262	18373	70014	Negative (Not in database)	True Negative
Aspergillus fumigatus	A fumag 204305	Bifidobacterium animalis	0.582	0.103	589	5712	Negative (Not in database)	True Negative
Aspergillus fumigatus	A fumigatus 16424	Bifidobacterium animalis	0.62	0.134	6047	45046	Negative (Not in database)	True Negative
human adenovirus	A rim 49626D-5	Lancefieldella parvulum	0.789	0.698	68326	97891	Negative (Not in database)	True Negative
Actinomyces visosus	A viscosus 15988	Actinomyces naeslundii	0.903	0.727	74639	102696	Negative (Not in database)	True Negative
Actinomyces viscosus	A viscosus 19246	Proteus mirabilis	0.971	0.951	82227	86420	Negative (Not in database)	True Negative
Bacillus paranthracis	B cereus 13016 1	Acinetobacter baumannii	0.973	0.397	2966	7462	Negative (Not in database)	True Negative
Bacillus paranthracis	B cereus 13061	Priestia megaterium	0.706	0.215	7690	35815	Negative (Not in database)	True Negative
Bacteroides fragilis	B frag 2 29762	Listeria monocytogenes	0.946	0.101	2141	21284	Negative (Not in database)	True Negative
Bacteroides ovatus	B ova BAA- 1296	Alloprevotella tannerae	0.773	0.279	19712	70630	Negative (Not in database)	True Negative
Bacteroides vulgatus	B vul 8482	Lactobacillus iners	0.962	0.138	7574	54855	Negative (Not in database)	True Negative
Betacoronavirus	Betacoro VR-1558D	Enterococcus faecalis	0.87	0.193	10761	55824	Negative (Not in database)	True Negative
Clostridioides difficile	C dif 9689	Peptostreptococcus anaerobius	0.708	0.135	8260	61165	Negative (Not in database)	True Negative
Clostridium haemolyticum	C haem 9650	Clostridium massiliodielmoense	0.861	0.895	19249	21505	Negative (Not in database)	True Negative
Corynebacterium jeikeium	C jeikei 43734	Corynebacterium amycolatum	0.927	0.142	1369	9625	Negative (Not in database)	True Negative
Campylobacter lari	C lari BAA- 1060D-5	Campylobacter jejuni	0.74	0.838	103441	123408	Negative (Not in database)	True Negative
Clostridium sordellii	C sor 9714	Clostridium perfringens	0.64	0.218	12993	59490	Negative (Not in database)	True Negative
Clostridium tetani	C tet 19406 1	Lactobacillus iners	0.959	0.3	7092	23647	Negative (Not in database)	True Negative
Chlamydia trachomatis	C tra 123- VR	Eggerthella lenta	0.699	0.617	43643	70789	Negative (Not in database)	True Negative
Chlamydia trachomatis	C tra VR- 348B	Eggerthella lenta	0.603	0.601	40980	68175	Negative (Not in database)	True Negative
Chlamydia trachomatis	C trac VR347	Eggerthella lenta	0.5	0.565	23890	42274	Negative (Not in database)	True Negative
Capnocytophaga haemolytica	Cap hac 51501	Streptococcus agalactiae	0.91	0.111	3904	35025	Negative (Not in database)	True Negative
Enterococcus avium	E avi 49462	Enterococcus faecium	0.953	0.549	2967	5405	Negative (Not in database)	True Negative
Enterococcus avium	E avi 49464	Enterococcus faecium	0.96	0.404	1988	4923	Negative (Not in database)	True Negative
Enterococcus avium	E avi 49465	Enterococcus faecium	0.957	0.468	4440	9485	Negative (Not in database)	True Negative
Enterococcus gallinarum	E gal 49608	Enterococcus faecium	0.91	0.439	19230	43825	Negative (Not in database)	True Negative
Enterococcus gallinarum	E gal 700425	Enterococcus faecium	0.915	0.441	20666	46834	Negative (Not in database)	True Negative
Faecalibacterium prausnitzii	F prau 27768	Gardnerella vaginalis	0.971	0.279	1795	6431	Negative (Not in database)	True Negative
Haemophilus ducreyi	H duc 51566	Pasteurella bettyae	0.731	0.275	19383	70478	Negative (Not in database)	True Negative
Haemophilus ducreyi	H duc 51568	Pasteurella bettyae	0.734	0.287	21680	75517	Negative (Not in database)	True Negative
Haemophilus ducreyi	H duc 700724	Pasteurella bettyae	0.732	0.29	22457	77316	Negative (Not in database)	True Negative
Helicobacter pylori	H pylori BAA945	Campylobacter jejuni	0.741	0.18	8532	47361	Negative (Not in database)	True Negative
Herpesvirus	H pylori BAA945	Campylobacter jejuni	0.741	0.18	8532	47361	Negative (Not in database)	True Negative
Herpesvirus	HSV1 VR- 539D	Bifidobacterium animalis	0.493	0.19	1630	8575	Negative (Not in database)	True Negative
Mycobacterium bovis	M bovis 10900	Acinetobacter baumannii	0.971	0.279	3415	12262	Negative (Not in database)	True Negative
Mycobacterium smegmatis	M rae 42647	Lactobacillus crispatus	0.872	0.122	213	1748	Negative (Not in database)	True Negative
Mycobacterium smegmatis	M smeg 14468	Mycolicibacterium hassiacum	0.814	0.562	24596	43747	Negative (Not in database)	True Negative
Mycobacterium tuberculosis	M tb 25177	Lactobacillus crispatus	0.928	0.16	116	724	Negative (Not in database)	True Negative
Mycobacterium tuberculosis	M tb 35818 1	Gardnerella vaginalis	0.95	0.14	155	1111	Negative (Not in database)	True Negative
Mycobacterium tuberculosis	M tb 526180	Lactobacillus crispatus	0.743	0.419	2217	5285	Negative (Not in database)	True Negative
Mycobacterium tuberculosis	M tb 55818	Gardnerella vaginalis	0.97	0.123	119	971	Negative (Not in database)	True Negative
Neisseria gonorrhoeae	N gon 31151	Neisseria sicca	0.884	0.607	14022	23092	Negative (Not in database)	True Negative
Neisseria gonorrhoeae	N gon 49286	Acinetobacter baumannii	0.97	0.444	3456	7788	Negative (Not in database)	True Negative
Neisseria gonorrhoeae	N gon 53422D	Neisseria sicca	0.874	0.545	14430	26484	Negative (Not in database)	True Negative
Proteus hauseri	P dis BAA- 1295	Parabacteroides provencensis	0.748	0.398	18527	46543	Negative (Not in database)	True Negative
Shigell flexneri	S flex 12022	Escherichia coli	0.966	0.644	31608	49064	Negative (Not in database)	True Negative
Streptococcus gallolyticus	S gal 49147 1	Streptococcus macedonicus	0.939	0.491	34094	69435	Negative (Not in database)	True Negative
Streptococcus gallolyticus	S gal 9809	Streptococcus equinus	0.951	0.481	35178	73076	Negative (Not in database)	True Negative
Streptococcus mutans	S mut 25175 1	Streptococcus macacae	0.804	0.464	34494	74361	Negative (Not in database)	True Negative
Streptococcus mutans	S mut 700610	Enterococcus faecium	0.953	0.967	46930	48514	Negative (Not in database)	True Negative
Neoscytalidium dimidiatum	Scy dim 66112	Acinetobacter baumannii	0.973	0.374	2855	7638	Negative (Not in database)	True Negative
Scytalidium lignicola	Scy lig 52538	Listeria monocytogenes	0.972	0.352	654	1859	Negative (Not in database)	True Negative
Trichomonas vaginalis	T vag 30235	Cutibacterium acnes	0.956	0.838	17556	20947	Negative (Not in database)	True Negative
Trichomonas vaginalis	T vag 30238	Bifidobacterium animalis	0.512	0.096	906	9486	Negative (Not in database)	True Negative
Trichomonas vaginalis	T vag 30239	Gardnerella vaginalis	0.973	0.373	1211	3251	Negative (Not in database)	True Negative
Acinetobacter baumannii	A baum BAA1790 1	Acinetobacter baumannii	0.967	0.873	75713	86736	Acinetobacter baumannii	True Positive
Lancefieldella parvulum	A par 33793 1	Lancefieldella parvulum	0.893	1	165942	165942	Lancefieldella parvulum	True Positive
Aerococcus urinae	A urinae 51268	Aerococcus urinae	0.923	1	159945	159945	Aerococcus urinae	True Positive
Aerococcus urinae	A urinae 700306 1	Aerococcus urinae	0.93	1	144199	144199	Aerococcus urinae	True Positive
Atopobium vaginae	A vaginalis BAA-55	Fannyhessea vaginae	0.944	0.867	44624	51452	Fannyhessea vaginae (new taxonomy)	True Positive
Atopobium vaginae	A vaginalis BAA-55DQ	Fannyhessea vaginae	0.936	0.968	191626	197949	Fannyhessea vaginae (new taxonomy)	True Positive
Aerococcus viridans	A viridans 10400	Aerococcus viridans	0.908	1	125520	125520	Aerococcus viridans	True Positive
Cutibacterium acnes	C acne 11827	Cutibacterium acnes	0.955	0.85	21214	24952	Cutibacterium acnes	True Positive
Cutibacterium acnes	C acnes 33179	Cutibacterium acnes	0.956	0.487	15685	32186	Cutibacterium acnes	True Positive
Cutibacterium acnes	C acnes 6919	Cutibacterium acnes	0.954	0.83	20988	25281	Cutibacterium acnes	True Positive
Candida albicans	C alb 14053 1	Candida albicans	0.971	0.491	10180	20716	Candida albicans	True Positive
Citrobacter freundii	C freundii 14135	Citrobacter freundii	0.973	1	70448	70448	Citrobacter freundii	True Positive
Citrobacter freundii	C freundii 33128	Citrobacter freundii	0.972	0.992	67335	67886	Citrobacter freundii	True Positive
Citrobacter freundii	C freundii BAA-3038	Citrobacter freundii	0.971	0.974	63661	65370	Citrobacter freundii	True Positive
Candida parapsilosis	C para 7330	Candida parapsilosis	0.942	0.977	34121	34922	Candida parapsilosis	True Positive
Candida parapsilosis	C para 90018	Candida parapsilosis	0.942	0.985	32787	33279	Candida parapsilosis	True Positive
Corynebacterium striatum	C stria 43735 1	Corynebacterium striatum	0.959	0.972	51965	53482	Corynebacterium striatum	True Positive
Corynebacterium striatum	C stria 9016	Corynebacterium striatum	0.96	0.989	68966	69718	Corynebacterium striatum	True Positive
Enterobacter cloacae	E clo 13047	Enterobacter cloacae	0.966	0.908	58193	64074	Enterobacter cloacae	True Positive
Enterobacter cloacae	E clo 35030	Enterobacter hormaechei	0.971	0.983	62942	64025	Enterobacter cloacae	True Positive
Enterobacter cloacae	E clo BAA3044	Enterobacter hormaechei	0.972	0.883	51192	57998	Enterobacter cloacae	True Positive
Escherichia coli	E coli 23735	Escherichia coli	0.964	0.632	28256	44689	Escherichia coli	True Positive
Escherichia coli	E coli 3047	Escherichia coli	0.961	0.671	27652	41199	Escherichia coli	True Positive
Escherichia coli	E coli 35150	Escherichia coli	0.959	0.897	55532	61903	Escherichia coli	True Positive
Enterococcus faecium	E fae BAA2127	Enterococcus faecium	0.956	0.645	15640	24255	Enterococcus faecium	True Positive
Enterococcus faecalis	E fcl 19433	Enterococcus faecalis	0.968	0.829	47754	57591	Enterococcus faecalis	True Positive
Enterococcus faecalis	E fcl 49478	Enterococcus faecalis	0.967	0.951	85368	89803	Enterococcus faecalis	True Positive
Enterococcus faecium	E fcm BAA- 2319	Enterococcus faecium	0.966	0.956	60393	63187	Enterococcus faecium	True Positive
Enterococcus hirae	E hin 49135	Enterococcus hirae	0.903	0.977	104428	106938	Enterococcus hirae	True Positive
Enterococcus hirae	E hirae 49479	Enterococcus hirae	0.901	0.958	111975	116836	Enterococcus hirae	True Positive
Enterobacter hormaechei	E hom 49162	Enterobacter hormaechei	0.938	0.973	61675	63417	Enterobacter hormaechei	True Positive
Finegoldia magna	F mag 15794	Finegoldia magna	0.95	0.987	139647	141467	Finegoldia magna	True Positive
Gardnerella vaginalis	G vag 14018	Gardnerella vaginalis	0.967	0.988	182843	185145	Gardnerella vaginalis	True Positive
Gardnerella vaginalis	G vag 14019	Gardnerella vaginalis	0.968	0.978	89067	91036	Gardnerella vaginalis	True Positive
Streptococcus pyogenes	GAS 11434	Streptococcus pyogenes	0.957	0.979	153568	156869	Streptococcus pyogenes	True Positive
Streptococcus pyogenes	GAS 12373	Streptococcus pyogenes	0.958	0.938	60393	64402	Streptococcus pyogenes	True Positive
Streptococcus pyogenes	GAS 19615	Streptococcus pyogenes	0.959	0.959	148988	155313	Streptococcus pyogenes	True Positive
Streptococcus agalactiae	GBS 12403	Streptococcus agalactiae	0.967	0.981	74833	76256	Streptococcus agalactiae	True Positive
Streptococcus agalactiae	GBS 70046	Streptococcus agalactiae	0.968	0.989	69742	70538	Streptococcus agalactiae	True Positive
Klebsiella aerogenes	K aer 15038	Klebsiella aerogenes	0.969	0.991	71300	71954	Klebsiella aerogenes	True Positive
Klebsiella aerogenes	K aer 35028	Klebsiella aerogenes	0.969	0.954	67726	71010	Klebsiella aerogenes	True Positive
Klebsiella aerogenes	K aer 51342	Klebsiella aerogenes	0.97	0.962	65761	68340	Klebsiella aerogenes	True Positive
Klebsiella oxytoca	K oxy 49131	Klebsiella oxytoca	0.974	0.961	55991	58245	Klebsiella oxytoca	True Positive
Klebsiella oxytoca	K oxy Z115	Klebsiella oxytoca	0.973	0.917	53235	58058	Klebsiella oxytoca	True Positive
Klebsiella pneumoniae	K pne 33495	Klebsiella pneumoniae	0.975	0.846	53953	63760	Klebsiella pneumoniae	True Positive
Klebsiella pneumoniae	K pne 49472	Klebsiella pneumoniae	0.975	0.822	52857	64332	Klebsiella pneumoniae	True Positive
Klebsiella pneumoniae	K pne Z1380XA48	Klebsiella pneumoniae	0.973	0.866	54396	62816	Klebsiella pneumoniae	True Positive
Klebsiella variicola	K varii 31488	Klebsiella variicola	0.975	0.935	59681	63852	Klebsiella variicola	True Positive
Lactobacillus acidophilus	L aci 4357	Lactobacillus acidophilus	0.933	0.981	137468	140111	Lactobacillus acidophilus	True Positive
Lactobacillus crispatus	L cri 33820	Lactobacillus crispatus	0.967	1	136282	136282	Lactobacillus crispatus	True Positive
Lactobacillus gasseri	L gas 33323	Lactobacillus gasseri	0.966	0.982	152182	154956	Lactobacillus gasseri	True Positive
Lacticaseibacillus rhamnosus	L ha 8530	Lacticaseibacillus rhamnosus	0.947	1	83513	83513	Lacticaseibacillus rhamnosus	True Positive
Lactobacillus iners	L iners 55195DQ	Lactobacillus iners	0.967	1	286771	286771	Lactobacillus iners	True Positive
Lactobacillus iners	L iners Z243	Lactobacillus iners	0.964	1	258350	258350	Lactobacillus iners	True Positive
Lactobacillus jensenii	L jenseni 25258	Lactobacillus jensenii	0.97	0.988	197161	199608	Lactobacillus jensenii	True Positive
Limosilactobacillus reuteri	L reut 53608	Limosilactobacillus reuteri	0.909	0.975	115029	117988	Limosilactobacillus reuteri	True Positive
Mobiluncus curtisii	M curt 51333	Mobiluncus curtisii	0.948	0.647	27747	42864	Mobiluncus curtisii	True Positive
Mycoplasma genitalium	M gent 49895	Mycoplasma genitalium	0.962	1	503774	503774	Mycoplasma genitalium	True Positive
Mycoplasma genitalium	M gent 49899	Mycoplasma genitalium	0.961	1	439956	439956	Mycoplasma genitalium	True Positive
Metamycoplasma hominis	M hom 27545	Metamycoplasma hominis	0.963	0.992	113390	114289	Metamycoplasma hominis	True Positive
Morganella morganii	M morg 29884	Morganella morganii	0.93	1	85245	85245	Morganella morganii	True Positive
Morganella morganii	M morg 8019	Morganella morganii	0.965	1	77789	77789	Morganella morganii	True Positive
Morganella morganii	M morg subsp sib 49948	Morganella morganii	0.932	1	84538	84538	Morganella morganii	True Positive
Mobiluncus mulieris	M mul 93064	Mobiluncus mulieris	0.951	1	128380	128380	Mobiluncus mulieris	True Positive
Pseudomonas aeruginosa	P aerug 27853	Pseudomonas aeruginosa	0.974	0.971	43995	45301	Pseudomonas aeruginosa	True Positive
Pseudomonas aeruginosa	P aerug 39018	Pseudomonas aeruginosa	0.975	0.963	40646	42191	Pseudomonas aeruginosa	True Positive
Peptostreptococcus anaerobius	P anae 27337	Peptostreptococcus anaerobius	0.916	0.976	131337	134570	Peptostreptococcus anaerobius	True Positive
Peptostreptococcus anaerobius	P anae 4903D-5	Peptostreptococcus anaerobius	0.921	0.986	121480	123199	Peptostreptococcus anaerobius	True Positive
Proteus mirabilis	P mir 43071	Proteus mirabilis	0.972	1	85059	85059	Proteus mirabilis	True Positive
Proteus mirabilis	P mir BAA- 856	Proteus mirabilis	0.97	1	77679	77679	Proteus mirabilis	True Positive
Proteus mirabilis	P mira 35659	Proteus mirabilis	0.972	1	73852	73852	Proteus mirabilis	True Positive
Proteus mirabilis	P mira 7002	Proteus mirabilis	0.972	1	64863	64863	Proteus mirabilis	True Positive
Proteus mirabilis	P mira Z050	Proteus mirabilis	0.969	1	82455	82455	Proteus mirabilis	True Positive
Proteus vulgaris	P vulg 33420	Proteus mirabilis	0.917	0.711	60002	84408	Proteus mirabilis	True Positive
Proteus vulgaris	P vulg 49132	Proteus mirabilis	0.928	0.669	55649	83174	Proteus mirabilis	True Positive
Streptococcus anginosus	S ang 33397 1	Streptococcus anginosus	0.964	0.92	31024	33737	Streptococcus anginosus	True Positive
Staphylococcus aureus	S aur 27660	Staphylococcus aureus	0.966	0.981	99152	101113	Staphylococcus aureus	True Positive
Staphylococcus aureus	S aur 51740	Staphylococcus aureus	0.961	1	110759	110759	Staphylococcus aureus	True Positive
Salmonella enterica	S ent 13076	Salmonella enterica	0.969	1	73126	73126	Salmonella enterica	True Positive
Salmonella enterica	S ent 13312	Salmonella enterica	0.969	1	71537	71537	Salmonella enterica	True Positive
Staphylococcus epidermidis	S epi 12228	Staphylococcus epidermidis	0.965	0.81	48820	60281	Staphylococcus epidermidis	True Positive
Staphylococcus epidermidis	S epi 49134	Staphylococcus epidermidis	0.963	1	60224	60224	Staphylococcus epidermidis	True Positive
Staphylococcus epidermidis	S epi 49461	Staphylococcus epidermidis	0.967	0.935	20592	22021	Staphylococcus epidermidis	True Positive
Stenotrophomonas maltophilia	S malt 700269	Stenotrophomonas maltophilia	0.928	1	75433	75433	Stenotrophomonas maltophilia	True Positive
Stenotrophomonas maltophilia	S malt BAA- 84	Stenotrophomonas maltophilia	0.918	0.986	67834	68797	Stenotrophomonas maltophilia	True Positive
Stenotrophomonas maltophilia	S malt BAA- 85	Stenotrophomonas maltophilia	0.92	0.987	67312	68210	Stenotrophomonas maltophilia	True Positive
Streptococcus mitis	S mit 49456 1	Streptococcus mitis	0.947	0.895	98866	110438	Streptococcus mitis	True Positive
Streptococcus salivarius	S sal 13419	Streptococcus salivarius	0.919	0.959	46327	48285	Streptococcus salivarius	True Positive
Staphylococcus saprophyticus	S sap 15305	Staphylococcus saprophyticus	0.963	1	53147	53147	Staphylococcus saprophyticus	True Positive
Staphylococcus saprophyticus	S sap 15305D-5	Staphylococcus saprophyticus	0.963	1	80570	80570	Staphylococcus saprophyticus	True Positive
Staphylococcus saprophyticus	S sap BAA750	Staphylococcus saprophyticus	0.962	0.984	88360	89780	Staphylococcus saprophyticus	True Positive
Ureaplasma urealyticum	U urea 27819	Ureaplasma urealyticum	0.949	0.895	252469	282009	Ureaplasma urealyticum	True Positive

## Sheet: Sup Table 2
TABLE 1
			Day 1			Day 2			Day 3				Inter-
Species. ATCC#	CFU/mL	Rep 1	Rep 2	Rep 3	Rep 1	Rep 2	Rep 3	Rep 1	Rep 2	Rep 3	Average	Std Dev	assay CV%
	37000000	0.572	0.575	0.57	0.579	0.581	0.576	0.568	0.572	0.565	0.573	0.005	0.87
	3700000	0.575	0.571	0.575	0.581	0.576	0.58	0.571	0.567	0.571	0.574	0.004	0.771
	370000	0.596	0.594	0.592	0.604	0.598	0.598	0.593	0.591	0.588	0.595	0.005	0.783
	37000	0.58	0.583	0.585	0.586	0.589	0.59	0.574	0.58	0.58	0.583	0.005	0.864
	3700	0.548	0.559	0.536	0.562	0.569	0.54	0.53	0.541	0.516	0.544	0.017	3.052
	370		0.487	0.265		0.492	0.279	0.312	0.445	0.243	0.36	0.11	30.433
	37	0.274	0.298		0.326	0.32		0.275	0.25		0.29	0.029	10.11
	3.7
Intra-assay	CV%		2			3.4			3.6
TABLE 2
			Day 1			Day 2			Day 3				Inter-
Species, ATCC#	CFU/mL	Rep 1	Rep 2	Rep 3	Rep 1	Rep 2	Rep 3	Rep 1	Rep 2	Rep 3	Average	Std Dev	assay CV%
	1640000	0.97	0.971	0.97	0.972	0.971	0.971	0.964	0.963	0.964	0.968	0	0.05
	164000	0.973	0.971	0.97	0.971	0.971	0.971	0.963	0.963	0.963	0.969	0.001	0.096
	16400	0.97	0.967	0.971	0.974	0.969	0.97	0.958	0.944	0.951	0.964	0.002	0.217
	1640	0.973	0.947	0.953	0.966	0.968	0.956	0.874	0.906	0.927	0.941	0.01	1.051
	164	0.863	0.937	0.761	0.895	0.892		0.544	0.636	0.512	0.755	0.066	8.768
	16.4	0.594	0.507	0.778	0.487	0.728					0.619	0.13	21.026
	1.64	0.408	0.671	0.748		0.421					0.562	0.173	30.795
	0.164	0.458	0	0.501	0.202		0.9				0.412	0.34	82.458
Intra-assay	CV%		1.4			0.7			2.9
TABLE 3
			Day 1			Day 2			Day 3				Inter-
Species, ATCC#	CFU/mL	Rep 1	Rep 2	Rep 3	Rep 1	Rep 2	Rep 3	Rep 1	Rep 2	Rep 3	Average	Std Dev	assay CV%
	240000	0.93	0.934	0.936	0.936	0.926	0.935	0.896	0.903	0.897	0.922	0.004	0.418
	24000	0.932	0.932	0.93	0.936	0.94	0.934	0.888	0.884	0.895	0.919	0.003	0.38
	2400	0.907	0.926	0.914	0.926	0.916	0.907	0.885	0.869	0.867	0.902	0.008	0.941
	240	0.671	0.707	0.882	0.835	0.917	0.9	0.574	0.704	0.678	0.763	0.105	13.732
	24		0.383		0.619	0.385	0.711				0.525	0.167	31.781
	2.4
	0.24
	0.024
Intra-assay	CV%		1			1			1

## Sheet: Sup Table 3
	C. albicans (N=388)	C. glabrata (N=47)	C. parapsilosis (N=14)	E.coli (n=1292)	Any Klebsiella species(n=63)	Strep. agalactiae (GBS) (N=478)	Enterococcus faecalis (N=137)	Any Prevotella species (N=6425)	Any Gardnerella species (N=7158)	Mobiluncus species (N=439)	Megasphaera species (N=4331)
C. albicans	1	2% (1/47)	0	6% (83/1292)	0	8% (39/478)	0.7% (1/137)	6% (385/6425)	1	3% (14/439)	6.5% (283/4331)
C. glabrata	0.2% (1/388)	1	0	1.1% (14/1292)	2% (1/63)	0.2% (1/478)	0.7% (1/137)	0.7% (47/6425)	1	0.5% (2/439)	0.9% (37/4331)
C. parapsilosis	0	0	1	0.2% (3/1292)	0	0.6% (3/478)	0	0.2% (14/6425)	1	0.2% (1/439)	0.2% (10/4331)
E.coli	20% (79/388)	30% (14/47)	21% (3/14)	1	60% (38/63)	49% (233/478)	72% (99/137)	20% (1292/6425)	1	26% (116/439)	28% (1220/4331)
Klebsiella	0	2% (1/47)	0	4% (53/1292)	1	3% (14/478)	17% (24/137)	1% (63/6425)	1	0.7% (2/439)	1% (58/4331)
S. agal (GBS)	6% (23/388)	2% (1/47)		18% (233/1292)	22% (14/63)	1	18% (25/137)	7% (478/6425)	1	8% (37/439)	9% (408/4331)
E. faecalis	0.2% (1/388)	2% (1/47)	0	8% (99/1292)	38% (24/63)	5% (25/478)	1	2% (137/6425)	1	3% (14/439)	3% (123/4331)
Any Prevotella	99% (385/388)	1	1	1	1	1	1	1	1	1	1
Any Gardnerella	1	1	1	1	1	1	1	1	1	1	1
Mobiluncus species	3.6% (14/388)	4% (2/47)	7% (1/14)	9% (116/1292)	5% (3/63)	8% (37/478)	10% (14/137)	7% (439/6425)	1	1	10% (423/4331)
Megasphaera species	73% (283/388)	79% (37/47)	71% (10/14)	94% (1220/1292)	92% (58/63)	85% (408/478)	90% (123/137)	67% (4331/6425)	1	96% (423/439)	1
